# Supplementary material for: Network-pharmacology-based validation of TAMS/CXCL-1 as key mediator of XIAOPI formula preventing breast cancer development and metastasis
Source: PubMed Central journal article supplement (PMC5674025; doi:10.1038/s41598-017-15030-3), 2017-11-06
Supplement: 41598_2017_15030_MOESM1_ESM.pdf [file 41598_2017_15030_MOESM1_ESM.pdf]

**Network-pharmacology-based validation of TAMS/CXCL-1 as key mediator of XIAOPI formula preventing breast cancer development and metastasis**

Neng Wang<sup>1,2</sup>, Yifeng Zheng<sup>1,2,3</sup>, Jiangyong Gu<sup>1</sup>, Youli Cai<sup>1,2</sup>, Shengqi Wang<sup>1,2,3</sup>, Fengxue Zhang<sup>2</sup>, Jianping Chen<sup>4</sup>, Honglin Situ<sup>1,2</sup>, Yi Lin<sup>1,2</sup>, Zhiyu Wang<sup>1,2,3\*</sup>

<sup>1</sup>The Research Centre for Integrative Medicine, Guangdong Provincial Academy of Chinese Medical Sciences, Guangzhou University of Chinese Medicine, Guangzhou, Guangdong, China

<sup>2</sup>Integrative Research Laboratory of Breast Cancer, Discipline of Integrated Chinese and Western Medicine, The second affiliated hospital of Guangzhou University of Chinese Medicine, Guangzhou, Guangdong, China

<sup>3</sup>Post-Doctoral Research Center, Guangzhou University of Chinese Medicine, Guangzhou, Guangdong, China;

<sup>4</sup>School of Chinese Medicine, the University of Hong Kong, Hong Kong SAR

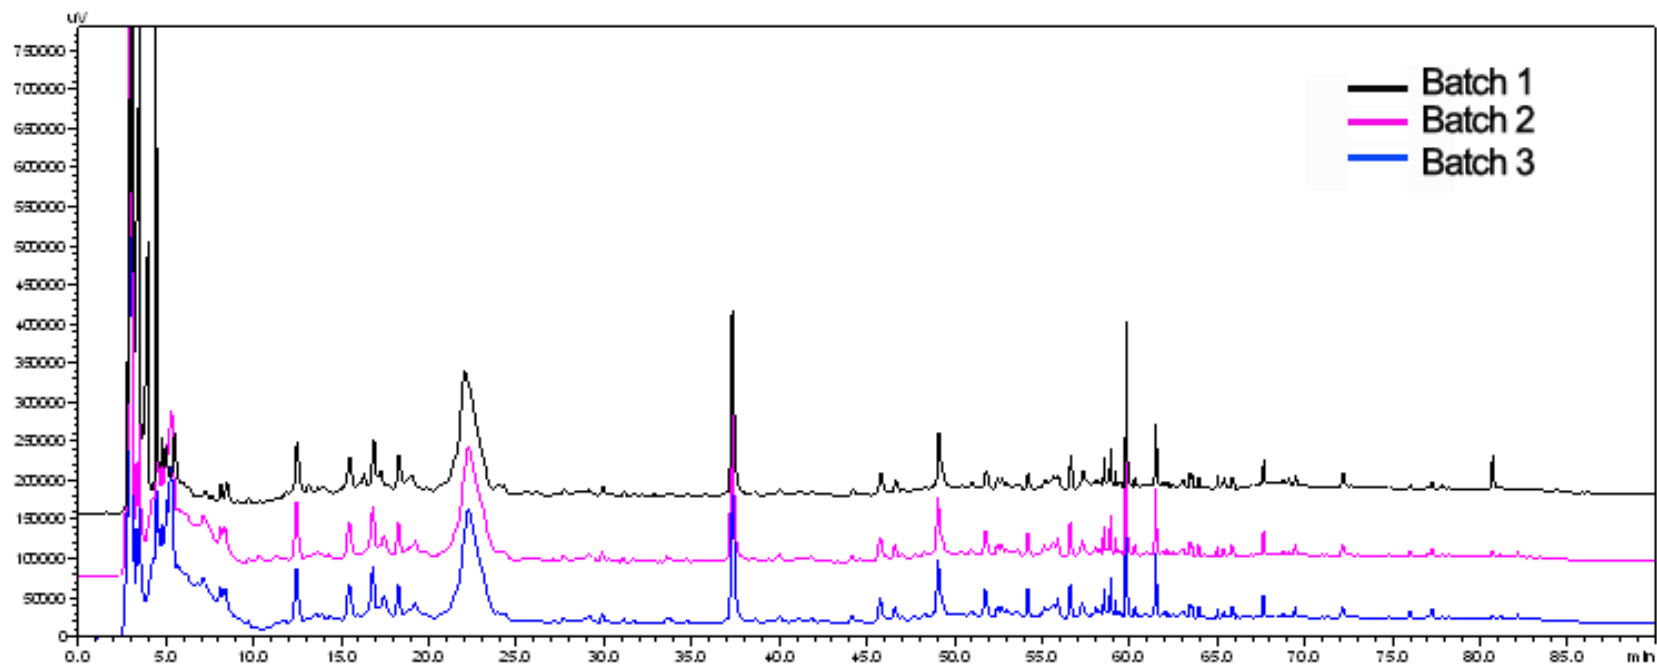

Supplementary Figure 1

Supplementary Figure 1 Chemical fingerprints remains consistent between 3 batches of XIOPI formula.

|   | A     | B              | C     | D             | E          | F        | G         | H     | I            | J            | K      | L     |
|---|-------|----------------|-------|---------------|------------|----------|-----------|-------|--------------|--------------|--------|-------|
| 1 | POS   | POS            | NEG   | NEG           | 6Ckine     | CTACK    | Eotaxin-1 | G-CSF | GM-CSF       | IL-2         | IL-3   | IL-4  |
| 2 | POS   | POS            | NEG   | NEG           | 6Ckine     | CTACK    | Eotaxin-1 | G-CSF | GM-CSF       | IL-2         | IL-3   | IL-4  |
| 3 | IL-5  | IL-6           | IL-9  | IL-10         | IL12p40/70 | IL-12p70 | IL-13     | IL-17 | IFN<br>gamma | KC           | Leptin | MCP-1 |
| 4 | IL-5  | IL-6           | IL-9  | IL-10         | IL12p40/70 | IL-12p70 | IL-13     | IL-17 | IFN<br>gamma | KC           | Leptin | MCP-1 |
| 5 | MCP-5 | MIP-1<br>alpha | MIP-2 | MIP-2<br>beta | RANTES     | SCF      | sTNFRI    | TARC  | TIMP-1       | TNF<br>alpha | THPO   | VEGF  |
| 6 | MCP-5 | MIP-1<br>alpha | MIP-2 | MIP-2<br>beta | RANTES     | SCF      | sTNFRI    | TARC  | TIMP-1       | TNF<br>alpha | THPO   | VEGF  |
| 7 | BLANK | BLANK          | BLANK | BLANK         | BLANK      | BLANK    | BLANK     | BLANK | BLANK        | BLANK        | BLANK  | POS   |
| 8 | BLANK | BLANK          | BLANK | BLANK         | BLANK      | BLANK    | BLANK     | BLANK | BLANK        | BLANK        | BLANK  | POS   |

**Supplementary Figure 2** Cytokine layout of the mouse cytokine antibody array C2 kits.

**Supplementary Table 1: The putative major ingredients and targets of 10 herbs in XIAOPI formula**

| Latin name                   | Chinese Name                                                                              | Number of Screening ingredients | Major ingredients                                                                                                                                                                                                                                                                                                                                                                                                                                                    | Number of Targets |
|------------------------------|-------------------------------------------------------------------------------------------|---------------------------------|----------------------------------------------------------------------------------------------------------------------------------------------------------------------------------------------------------------------------------------------------------------------------------------------------------------------------------------------------------------------------------------------------------------------------------------------------------------------|-------------------|
| <b>Epimedium Brevicornum</b> | <br>淫羊藿 | 23                              | 24-epicampesterol<br>Linoleyl acetate<br>poriferast-5-en-3beta-ol<br>DFV<br>Chryseriol<br>8-Isopentenyl-kaempferol<br>sitosterol<br>kaempferol<br>olivil<br>Anhydroicaritin<br>C-Homoerythrinan, 1,6-didehydro-<br>3,15,16-trimethoxy-, (3.beta.)-<br>Yinyanghuo A<br>Yinyanghuo C<br>Yinyanghuo E<br>6-hydroxy-11,12-dimethoxy-2,2-dimethyl-1,8-dioxo<br>-2,3,4,8-tetrahydro-1H-isochromeno[3,4-h]<br>isoquinolin-2-ium<br>8-(3-methylbut-2-enyl)-2-phenyl-chromone | 246               |

|                                  |                                                                                    |   |                                                                                                                                                                     |     |
|----------------------------------|------------------------------------------------------------------------------------|---|---------------------------------------------------------------------------------------------------------------------------------------------------------------------|-----|
|                                  |                                                                                    |   | Anhydroicaritin-3-O-alpha-L-rhamnoside<br>1,2-bis(4-hydroxy-3-methoxyphenyl)propan-1,3-diol<br>Icariin<br>Icariside A7<br>luteolin<br>Magnograndiolide<br>quercetin |     |
| <b>Cistanche<br/>Deserticola</b> |   | 6 | beta-sitosterol<br>Marckine<br>arachidonate<br>quercetin<br>suchilactone<br>Yangambin                                                                               | 198 |
| <b>Ligustrum<br/>Lucidum</b>     |  | 9 | beta-sitosterol<br>kaempferol<br>taxifolin<br>Lucidumoside D<br>Lucidumoside D_qt<br>eriodictyol<br>Olitoriside_qt<br>luteolin<br>quercetin                         | 215 |
|                                  |                                                                                    |   | 1,2,5,6-tetrahydrotanshinone<br>Poriferasterol<br>poriferast-5-en-3beta-ol<br>isoimperatorin                                                                        |     |

Salvia  
Miltiorrhiza

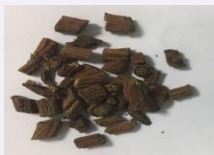

丹参

38

sugiol  
Dehydrotanshinone II A  
5,6-dihydroxy-7-isopropyl-1,1  
-dimethyl-2,3-dihydrophenanthren-4-one  
2-isopropyl-8-methylphenanthrene-3,4-dione  
3 $\alpha$ -hydroxytanshinone II a  
4-methylenemiltirone  
formyltanshinone  
Methylenetanshinquinone  
przewaquinone c  
sclareol  
tanshinaldehyde  
Danshenol B  
Salvilenone  
cryptotanshinone  
dan-shexinkum d  
danshenspiroketallactone  
deoxyneocryptotanshinone  
dihydrotanshinlactone  
dihydrotanshinone I  
epidanshenspiroketallactone  
C09092  
isocryptotanshi-none  
Isotanshinone II  
manool  
miltionone II

115

|                                            |                                                                                              |   |                                                                                                                                                                                                                                                                                                                           |    |
|--------------------------------------------|----------------------------------------------------------------------------------------------|---|---------------------------------------------------------------------------------------------------------------------------------------------------------------------------------------------------------------------------------------------------------------------------------------------------------------------------|----|
|                                            |                                                                                              |   | <p>miltipolone</p> <p>Miltirone</p> <p>neocryptotanshinone ii</p> <p>1-methyl-8,9-dihydro-7H-naphtho[5,6-g]benzofuran-6,10,11-trione</p> <p>salvilenone I</p> <p>salviolone</p> <p>tanshinone iia</p> <p>(6S)-6-(hydroxymethyl)-1,6-dimethyl-8,9-dihydro-7H-naphtho[8,7-g]benzofuran-10,11-dione</p> <p>tanshinone VI</p> |    |
| <p><b>Curcuma</b><br/><b>Aromatica</b></p> |  <p>郁金</p>  | 3 | <p>beta-sitosterol</p> <p>Sitosterol</p> <p>Naringenin</p>                                                                                                                                                                                                                                                                | 69 |
| <p><b>Rhizoma</b><br/><b>Curcumae</b></p>  |  <p>莪术</p> | 3 | <p>hederagenin</p> <p>Germacron</p> <p>curzerene</p> <p>galeopsin</p> <p>ZINC04073977</p> <p>preleoheterin</p>                                                                                                                                                                                                            | 32 |

|                                            |                                                                                          |   |                                                                                  |     |
|--------------------------------------------|------------------------------------------------------------------------------------------|---|----------------------------------------------------------------------------------|-----|
| <b>Leonurus heterophyllus</b>              | <br>益母草 | 8 | iso-preleoheterin<br>quercetin<br>arachidonic acid<br>isorhamnetin<br>kaempferol | 223 |
| <b>Radix Polygoni Multiflori Preparata</b> | <br>何首乌 | 6 | questin<br>rhein<br>emodin<br>polygodial<br>chrysazin<br>resveratrol<br>aluminum | 358 |
| <b>Crassostrea Gigas</b>                   | <br>牡蛎  | 5 | calcium sulphate<br>calcium phosphate<br>silicon<br>calcium carbonate            | 149 |
| <b>Carapax Trionycis</b>                   | <br>鳖甲 | 4 | gondoic acid<br>Vaccenic acid<br>8-Octadecenoic acid<br>oleic acid               | 182 |



**Supplementary Table 2** The targeting genes of XIAOPI formula related to breast cancer

---

*COL1A1 POSTN EGFR SPARC FN1 TF CXCL10 MMP2 STAT1 CCNA2 NCOA3 IFI27 E2F1 PLAT JUN TGFA CAV1 HSPA5 BIRC5 BMP2 FAP PCNA FOS TGFB2 PDGFB INSR  
TNFRSF10B CDK2 NCOA1 GSTP1 CTSK PIK3CB CA2 CHEK1 NR1I2 TOP2A GSTM1 PPARA CAT CD80 EGR1 PARP1 IL2RA EDNRA CCNE1 VEGFA CDK1 PDGFRB BCL2  
GNAS MMP1 CCNB1 RAD51HIF1A G6PD PTGS1 MAP2K1 CXCL1 ROCK1 FGF1 SPP1 PLAU VCAM1 BRCA2 ERCC1 PTGS2 CDKN2A EGF TNS1 PRKAA1 TNFRSF10A IRS1  
MAPK14 CCNE2 GDF15 PTK2 CLDN4 CD28 SLC6A3 CFLAR BRCA1*

---
